# Supplementary material for: RNA Chaperone Function of a Universal Stress Protein in Arabidopsis Confers Enhanced Cold Stress Tolerance in Plants
Source: MDPI journal article supplement (doi:10.3390/ijms18122546), 2017-11-27
Supplement: s1 [file s1]

# Supplementary Materials: RNA Chaperone Function of a Universal Stress Protein in Arabidopsis Confers Enhanced Cold Stress Tolerance in Plants

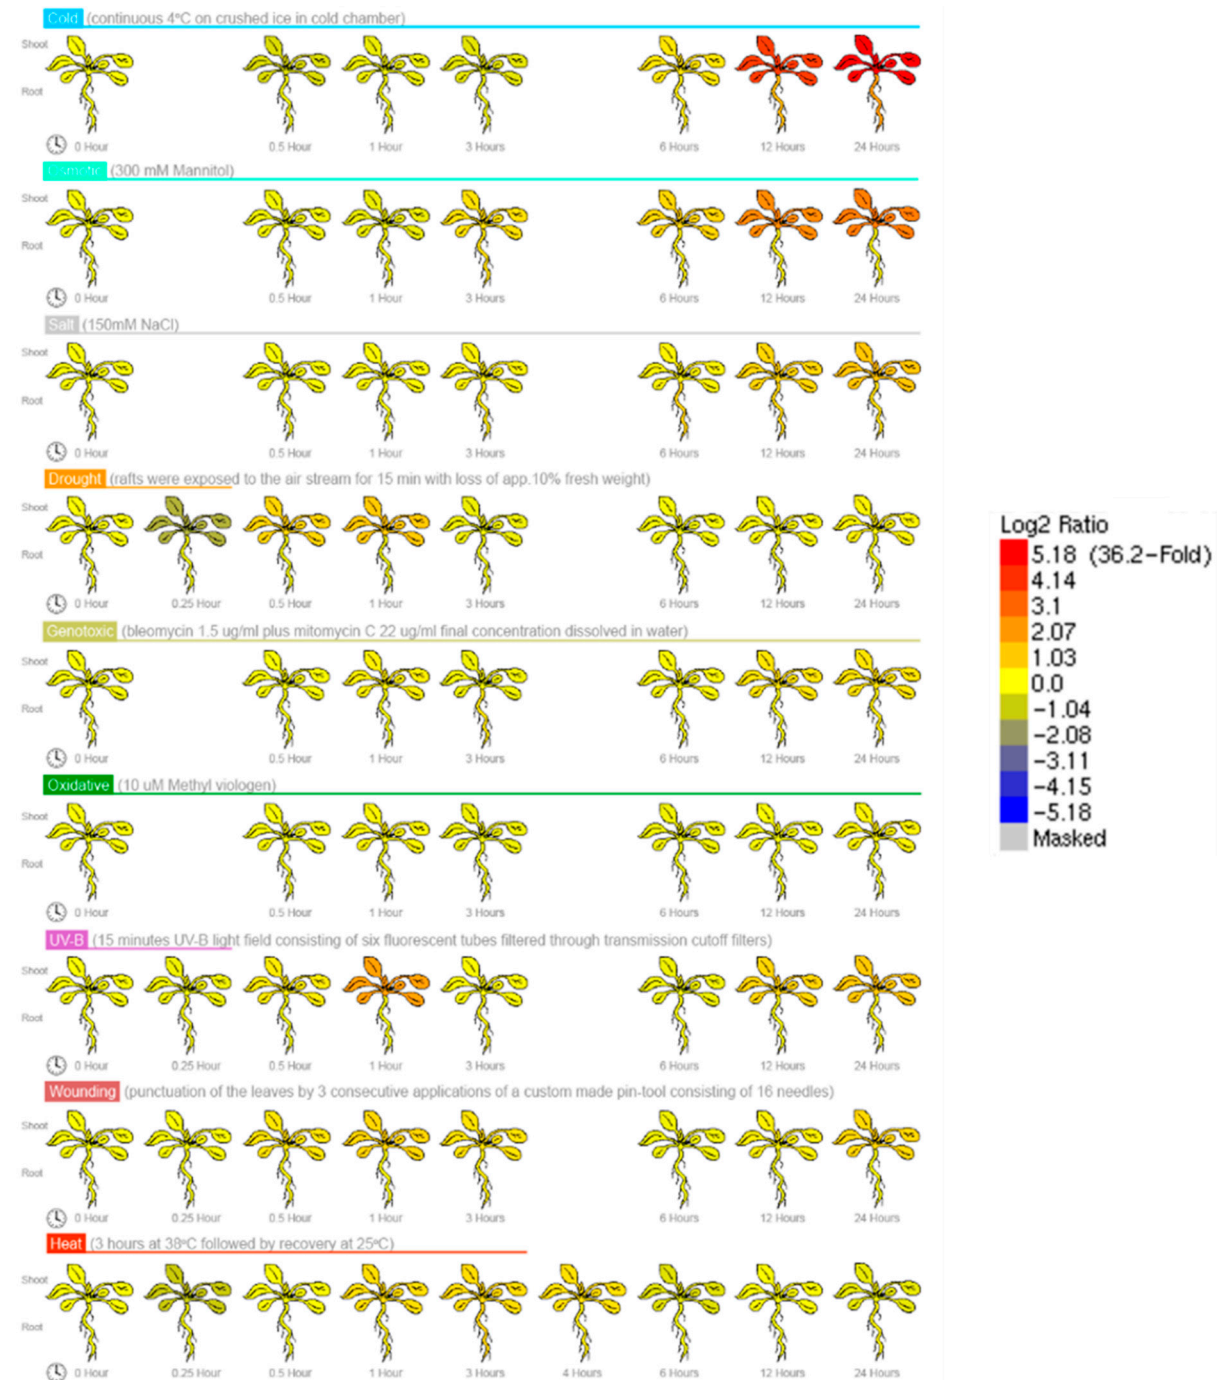

**Figure S1.** Gene expression pattern of *AtUSP* (At3g53990) under diverse stress conditions analyzed using the eFP browser.

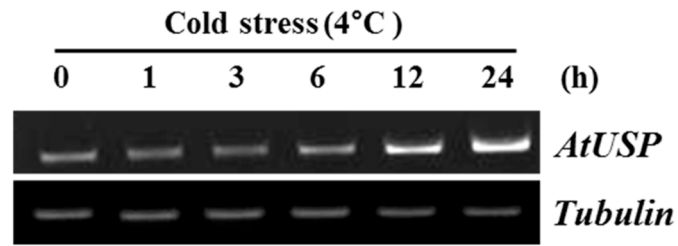

**Figure S2.** RT-PCR analyses of *AtUSP* mRNA expression patterns under cold stress conditions in WT. Ten-day-old WT seedlings grown in MS agar plates were subjected to 4°C. RNA samples were collected at 0, 1, 3, 6, 12, and 24 h, RT-PCR analyses were performed using specific *AtUSP* primers. Relative *AtUSP* mRNA expression levels were determined with respect to the relative abundance of *Tubulin*.

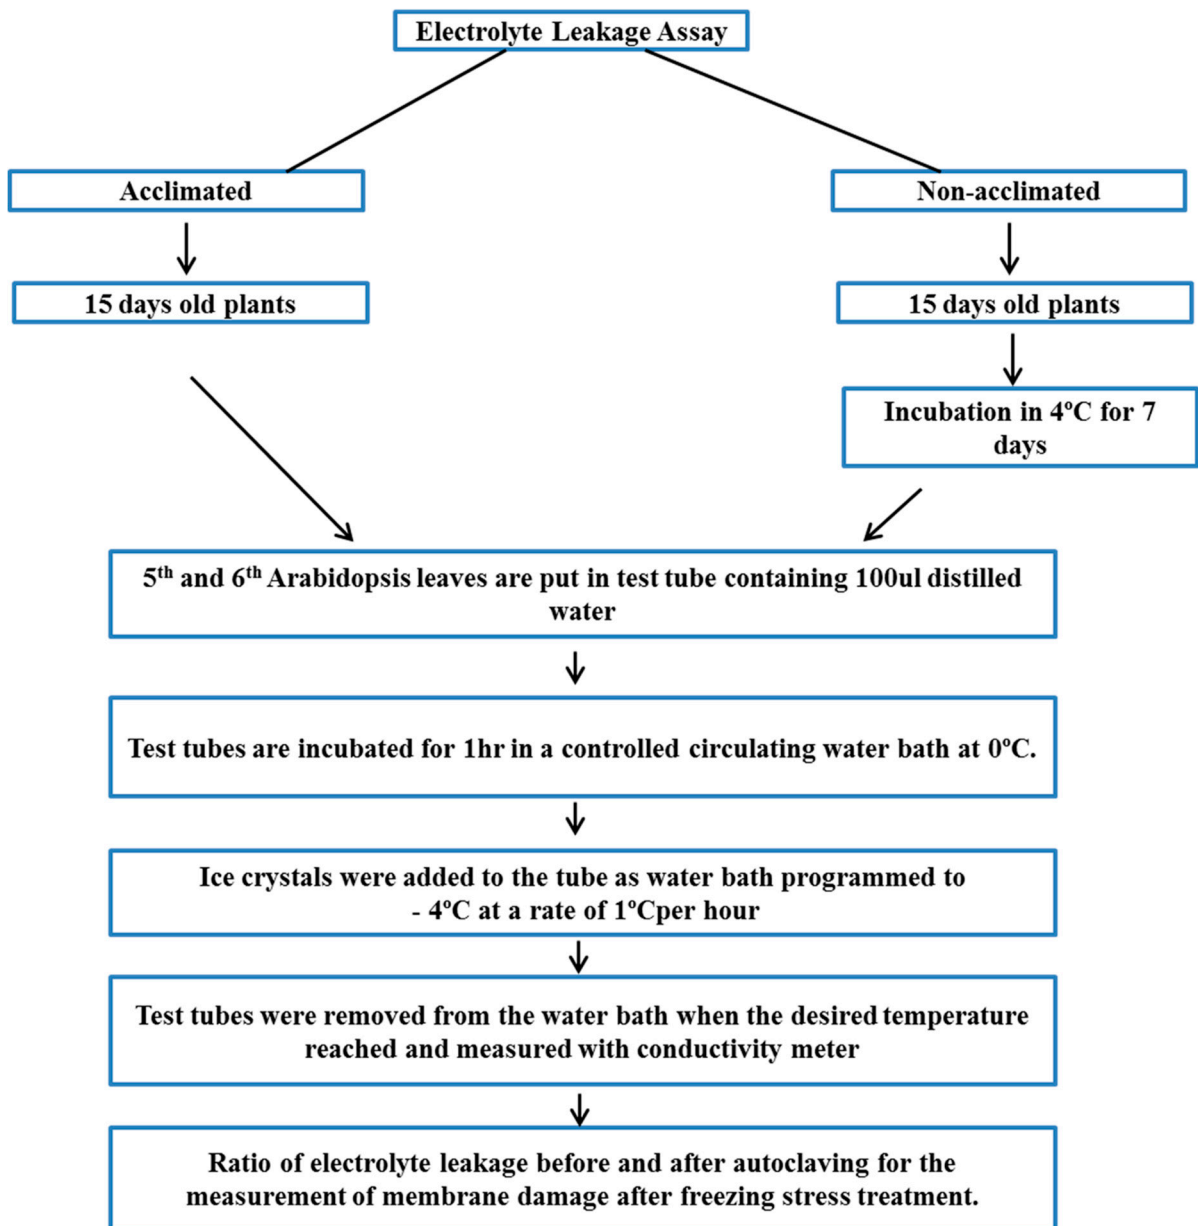

**Figure S3.** Schematic diagram of electrolyte leakage assay.
